# Supplementary material for: The TCR repertoire of α-synuclein-specific T cells in Parkinson’s disease is surprisingly diverse
Source: PubMed Central journal article supplement (PMC7801678; doi:10.1038/s41598-020-79726-9), 2021-01-11
Supplement: 41598_2020_79726_MOESM2_ESM.pdf [file 41598_2020_79726_MOESM2_ESM.pdf]

**The TCR repertoire of  $\alpha$ -synuclein-specific T cells in Parkinson's disease is surprisingly diverse**

Akul Singhanian, John Pham, Rekha Dhanwani, April Frazier, Juliana Rezende Dutra, Karen S. Marder, Elizabeth Phillips, Simon Mallal, Amy W. Amara, David G. Standaert, David Sulzer, Bjoern Peters, Alessandro Sette, Cecilia S. Lindestam Arlehamn

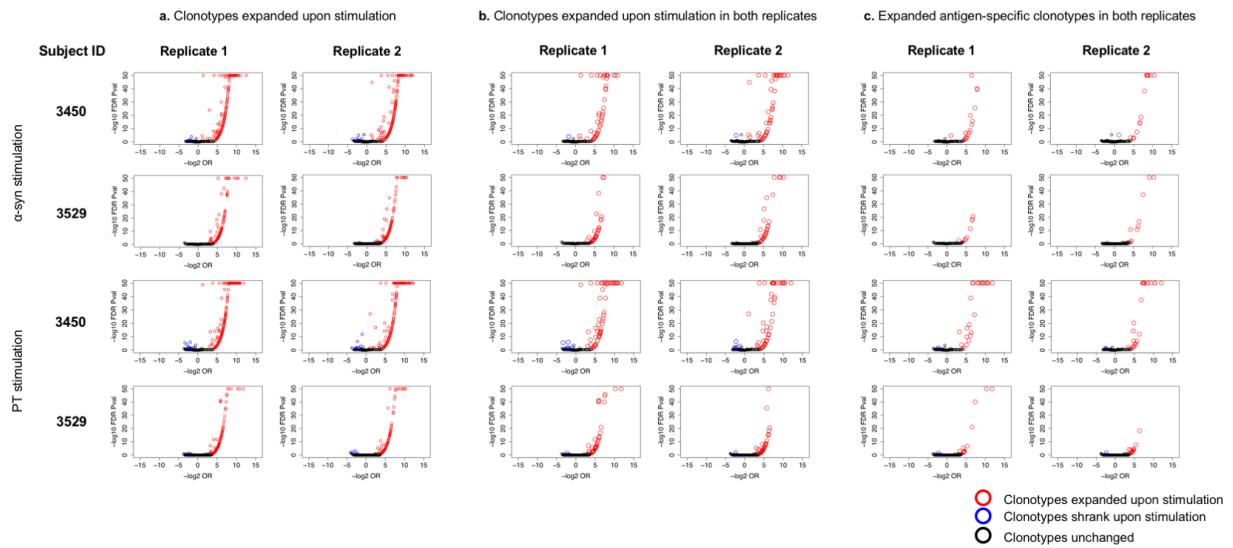

Supplemental figure 1

**Supplementary Figure 1. Specific clonotypes expand in response to  $\alpha$ -syn and PT peptides.** (a) Clonotypes expanded in response to antigen stimulation in each replicate. (b) Clonotypes that have expanded in both replicates in response to antigen with their magnitude of expansion in both replicates represented. (c) Antigen-specific clonotypes expanded in both replicates, excluding clonotypes that also expand in response to the other antigen. Plots for two representative PD subjects are shown.  $\alpha$ -Syn, top two rows, PT, bottom two rows. Expanded clonotypes following stimulation in red and clonotypes present at higher frequency before stimulation in CD4 T cells in blue. Black indicates clonotypes that did not expand.

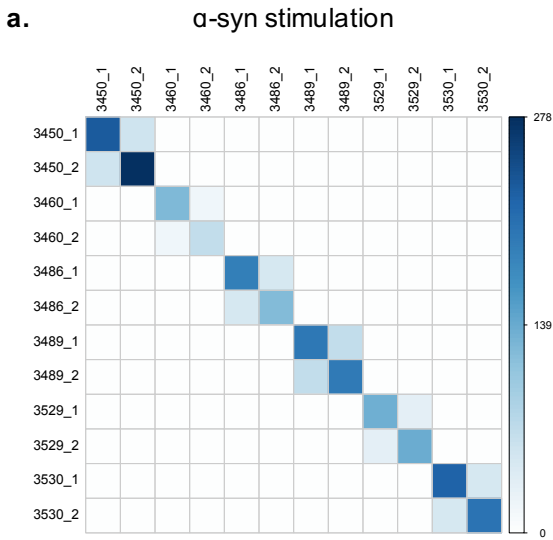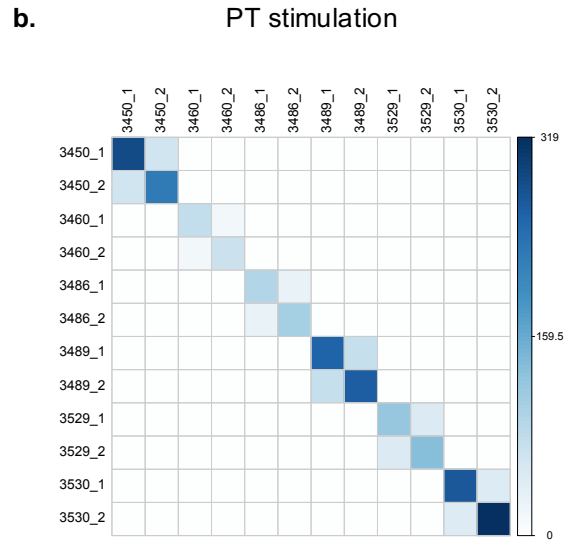

**Supplementary Figure 2. Individual-specific repertoire in PD patients.** Overlap of the significantly expanded clonotypes between donors and replicates upon (a)  $\alpha$ -syn, or (b) PT stimulation, based on the exact clonotype rearrangement sequence. Blue indicates shared clonotypes, with higher color intensity indicating greater overlap, and white indicates no overlap.

**Supplementary Table 1. GLIPH analysis**

|                                                                                                                       | Subject ID | Clonotypes expanded in |             |                 | GLIPH analysis |        |                                                                 |                     |                    |
|-----------------------------------------------------------------------------------------------------------------------|------------|------------------------|-------------|-----------------|----------------|--------|-----------------------------------------------------------------|---------------------|--------------------|
|                                                                                                                       |            | Replicate 1            | Replicate 2 | Both replicates | 3-mers         | 4-mers | Convergence groups <sup>1</sup><br>No. groups<br>(No. peptides) | Global convergences | Local convergences |
| Similarity between Replicate 1 and 2 after $\alpha$ -syn stimulation within each PD subject                           | 3450       | 231                    | 278         | 56              | 1              | 1      | 3 (4)<br>4 (2)                                                  | 7                   | 12                 |
|                                                                                                                       | 3460       | 124                    | 67          | 19              | -              | -      | -                                                               | -                   | -                  |
|                                                                                                                       | 3486       | 190                    | 122         | 48              | -              | -      | 3 (2)                                                           | 3                   | -                  |
|                                                                                                                       | 3489       | 199                    | 197         | 67              | -              | 1      | 1 (4)<br>3 (2)                                                  | 4                   | 6                  |
|                                                                                                                       | 3529       | 136                    | 137         | 33              | -              | -      | 2 (2)                                                           | 2                   | -                  |
|                                                                                                                       | 3530       | 225                    | 204         | 49              | -              | 1      | 1 (4)<br>3 (2)                                                  | 2                   | 28                 |
| Similarity between clonotypes expanded in both replicates across all subjects                                         |            |                        |             |                 | -              | -      | -                                                               | 2                   | -                  |
| Similarity between Replicate 1 and 2 after PT stimulation within each PD subject                                      | 3450       | 287                    | 226         | 61              | -              | 1      | 1 (5)<br>7 (2)                                                  | 7                   | 10                 |
|                                                                                                                       | 3460       | 78                     | 70          | 17              | 1              | -      | 1 (4)                                                           | -                   | 6                  |
|                                                                                                                       | 3486       | 93                     | 108         | 30              | -              | -      | 1 (2)                                                           | 1                   | -                  |
|                                                                                                                       | 3489       | 258                    | 264         | 75              | -              | -      | 1 (2)                                                           | 1                   | -                  |
|                                                                                                                       | 3529       | 122                    | 135         | 48              | -              | -      | 1 (2)                                                           | 1                   | -                  |
|                                                                                                                       | 3530       | 269                    | 319         | 47              | -              | 2      | 2 (4)<br>7 (2)                                                  | 8                   | 12                 |
| Similarity between clonotypes expanded in both replicates across all subjects                                         |            |                        |             |                 | -              | -      | 2 (2)                                                           | 2                   | -                  |
| Similarity between Replicate 1 and 2 after PT stimulation within each HC subject                                      | 3447       | 135                    | 134         | 56              | -              | -      | 1 (2)                                                           | 1                   | -                  |
|                                                                                                                       | 3452       | 270                    | 239         | 45              | 2              | 1      | 1 (5)<br>3 (4)<br>3 (2)                                         | 13                  | 18                 |
|                                                                                                                       | 3457       | 299                    | 363         | 121             | -              | 2      | 1 (5)<br>1 (4)<br>4 (2)                                         | 5                   | 12                 |
|                                                                                                                       | 3459       | 194                    | 143         | 78              | -              | -      | 3 (2)                                                           | 3                   | -                  |
|                                                                                                                       | 3466       | 241                    | 221         | 112             | -              | 2      | 1 (5)<br>1 (4)<br>2 (2)                                         | 5                   | 16                 |
|                                                                                                                       | 3487       | 123                    | 127         | 50              | -              | -      | 2 (2)                                                           | 2                   | -                  |
|                                                                                                                       | 3495       | 122                    | 182         | 37              | -              | 1      | 1 (6)<br>3 (2)                                                  | 9                   | 6                  |
| Similarity between clonotypes expanded in both replicates across all subjects                                         |            |                        |             |                 | -              | 1      | 1 (4)<br>8 (2)                                                  | 8                   | 6                  |
| Similarity between clonotypes expanded in both replicates across all subjects in PT-stimulated conditions (PD and HC) |            |                        |             |                 | -              | -      | 2(3)<br>10 (2)                                                  | 14                  | -                  |

<sup>1</sup> Convergence groups are reported as the number of groups with the number of peptides in each.

**Supplementary Table 2. HLA-type of the participants that were studied by TCR sequencing.**

| ID   | A                   | B                   | C                   | DPB1                      | DQA1                      | DQB1                      | DRB1                      | DRB3/4/5                  |
|------|---------------------|---------------------|---------------------|---------------------------|---------------------------|---------------------------|---------------------------|---------------------------|
| 3450 | A*01:01/<br>A*03:01 | B*07:02/<br>B*08:01 | C*07:01/<br>C*07:02 | DPB1*04:01/<br>DPB1*04:01 | DQA1*01:01/<br>DQA1*01:02 | DQB1*05:01/<br>DQB1*06:02 | DRB1*01:01/<br>DRB1*15:01 | DRB5*01:01/               |
| 3460 | A*01:01/<br>A*03:01 | B*07:02/<br>B*08:01 | C*07:01/<br>C*07:02 | DPB1*02:01/<br>DPB1*04:01 | DQA1*01:02/<br>DQA1*05:01 | DQB1*02:01/<br>DQB1*06:02 | DRB1*03:01/<br>DRB1*15:01 | DRB3*01:01/<br>DRB5*01:01 |
| 3486 | A*02:01/<br>A*02:01 | B*15:01/<br>B*27:05 | C*03:04/<br>C*16:02 | DPB1*04:01/<br>DPB1*04:02 | DQA1*03:01/<br>DQA1*05:01 | DQB1*03:01/<br>DQB1*03:02 | DRB1*01:03/<br>DRB1*04:01 | DRB4*01:01/               |
| 3489 | A*02:01/<br>A*11:01 | B*35:01/<br>B*51:01 | C*03:03/<br>C*04:01 | DPB1*04:01/<br>DPB1*05:01 | DQA1*01:01/<br>DQA1*05:01 | DQB1*03:01/<br>DQB1*05:01 | DRB1*01:01/<br>DRB1*12:01 | DRB3*02:02/               |
| 3529 | A*01:01/<br>A*03:01 | B*07:02/<br>B*57:01 | C*06:02/<br>C*07:02 | DPB1*04:01/<br>DPB1*04:02 | DQA1*01:03/<br>DQA1*02:01 | DQB1*03:03/<br>DQB1*06:03 | DRB1*07:01/<br>DRB1*13:01 | DRB3*01:01/<br>DRB4*01:01 |
| 3530 | A*02:11/<br>A*24:02 | B*15:01/<br>B*40:06 | C*03:03/<br>C*15:02 | DPB1*04:01/<br>DPB1*04:01 | DQA1*01:01/<br>DQA1*01:03 | DQB1*05:03/<br>DQB1*06:01 | DRB1*14:04/<br>DRB1*15:01 | DRB3*02:02/<br>DRB5*01:01 |
| 3447 | A*02:01/<br>A*24:02 | B*07:02/<br>B*40:01 | C*03:04/<br>C*07:02 | DPB1*11:01/<br>DPB1*15:01 | DQA1*01:02/<br>DQA1*02:01 | DQB1*02:02/<br>DQB1*06:04 | DRB1*07:01/<br>DRB1*13:02 | DRB3*03:01/<br>DRB4*01:01 |
| 3452 | A*02:01/<br>A*03:01 | B*27:05/<br>B*40:01 | C*02:02/<br>C*03:04 | DPB1*03:01/<br>DPB1*05:01 | DQA1*01:02/<br>DQA1*01:02 | DQB1*06:02/<br>DQB1*06:04 | DRB1*13:02/<br>DRB1*15:01 | DRB3*03:01/<br>DRB5*01:01 |
| 3457 | A*01:01/<br>A*74:03 | B*08:01/<br>B*44:03 | C*04:01/<br>C*07:01 | DPB1*02:01/<br>DPB1*04:01 | DQA1*03:01/<br>DQA1*05:01 | DQB1*02:01/<br>DQB1*03:01 | DRB1*03:01/<br>DRB1*04:01 | DRB3*01:01/<br>DRB4*01:01 |
| 3459 | A*02:01/<br>A*11:01 | B*08:01/<br>B*15:01 | C*03:03/<br>C*07:02 | DPB1*02:01/<br>DPB1*04:01 | DQA1*01:03/<br>DQA1*05:01 | DQB1*02:01/<br>DQB1*06:03 | DRB1*03:01/<br>DRB1*13:01 | DRB3*01:01/<br>DRB3*02:02 |
| 3466 | A*03:01/<br>A*23:01 | B*41:02/<br>B*49:01 | C*07:01/<br>C*17:01 | DPB1*03:01/<br>DPB1*04:01 | DQA1*01:02/<br>DQA1*05:01 | DQB1*03:01/<br>DQB1*05:02 | DRB1*13:03/<br>DRB1*16:01 | DRB3*01:01/<br>DRB5*02:02 |
| 3487 | A*11:01/<br>A*30:01 | B*08:01/<br>B*51:01 | C*07:01/<br>C*14:02 | DPB1*01:01/<br>DPB1*03:01 | DQA1*01:03/<br>DQA1*05:01 | DQB1*02:01/<br>DQB1*06:03 | DRB1*03:01/<br>DRB1*13:01 | DRB3*01:01/<br>DRB3*01:01 |
| 3495 | A*01:01/<br>A*24:02 | B*08:01/<br>B*40:01 | C*03:04/<br>C*07:01 | DPB1*04:01/<br>DPB1*04:01 | DQA1*01:02/<br>DQA1*01:03 | DQB1*06:02/<br>DQB1*06:03 | DRB1*13:01/<br>DRB1*15:01 | DRB3*02:02/<br>DRB5*01:01 |
